# Supplementary material for: Miniaturized Near-Infrared (MicroNIR) Spectrometer in Plastic Waste Sorting
Source: MDPI journal article supplement (doi:10.3390/ma12172740), 2019-08-27
Supplement: s1 [file s1]

Article

# Miniaturized Near-Infrared (MicroNIR) Spectrometer in Plastic Waste Sorting

**Monika Rani** <sup>1,2,†</sup>, **Claudio Marchesi** <sup>1,2,†</sup>, **Stefania Federici** <sup>1,2,\*</sup>, **Gianluca Rovelli** <sup>3</sup>, **Ivano Alessandri** <sup>2,4,5</sup>, **Irene Vassalini** <sup>2,4,5</sup>, **Serena Ducoli** <sup>2,4</sup>, **Laura Borgese** <sup>1,2</sup>, **Annalisa Zacco** <sup>1,2</sup>, **Fabjola Bilo** <sup>1,2</sup>, **Elza Bontempi** <sup>1,2</sup> and **Laura E. Depero** <sup>1,2</sup>

<sup>1</sup> Department of Mechanical and Industrial Engineering, University of Brescia, via Branze, 38-25123, Brescia, Italy

<sup>2</sup> Consorzio Interuniversitario Nazionale per la Scienza e Tecnologia dei Materiali (INSTM), 50121 Firenze, Italy

<sup>3</sup> ABCS Srl-Scientific Instruments & Materials Science, viale Regina Giovanna, 37-20129 Milan, Italy

<sup>4</sup> Department of Information Engineering, University of Brescia, via Branze, 38–25123, Brescia, Italy

<sup>5</sup> CNR-INO, Unit of Brescia, 25123 Brescia, Italy

† these authors are equally contributed.

\* Correspondence: stefania.federici@unibs.it

## Supplementary Materials

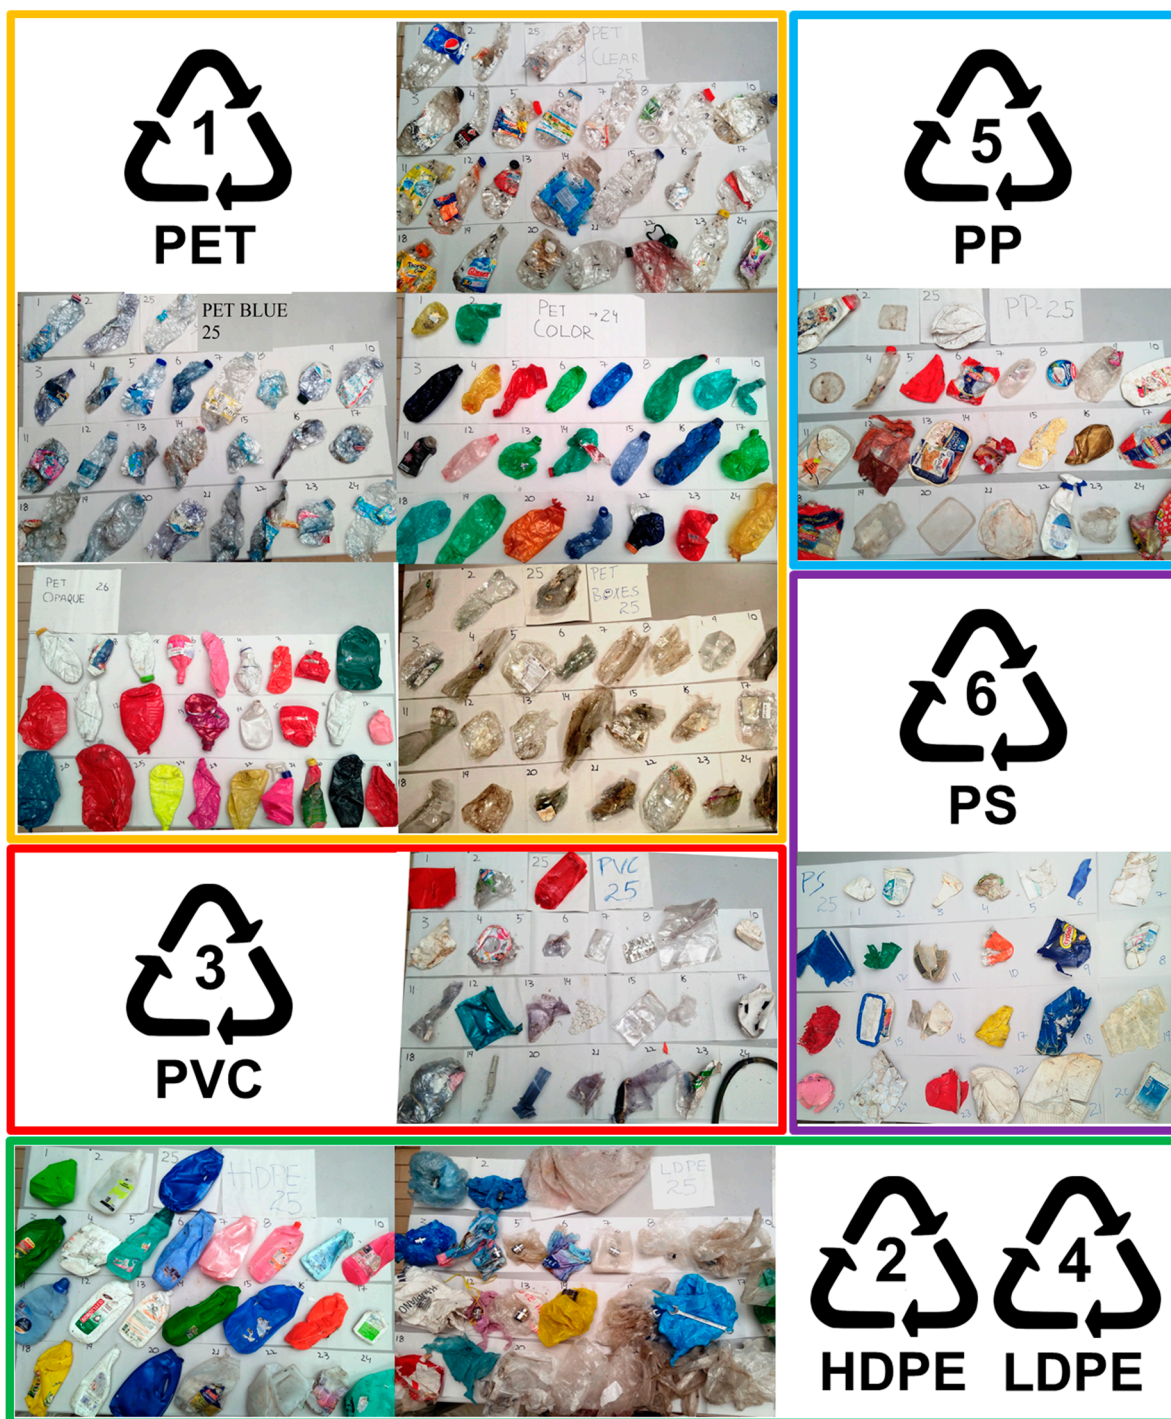

**Figure S1.** Systematic organization of the collected urban plastic waste for laboratory measurements.

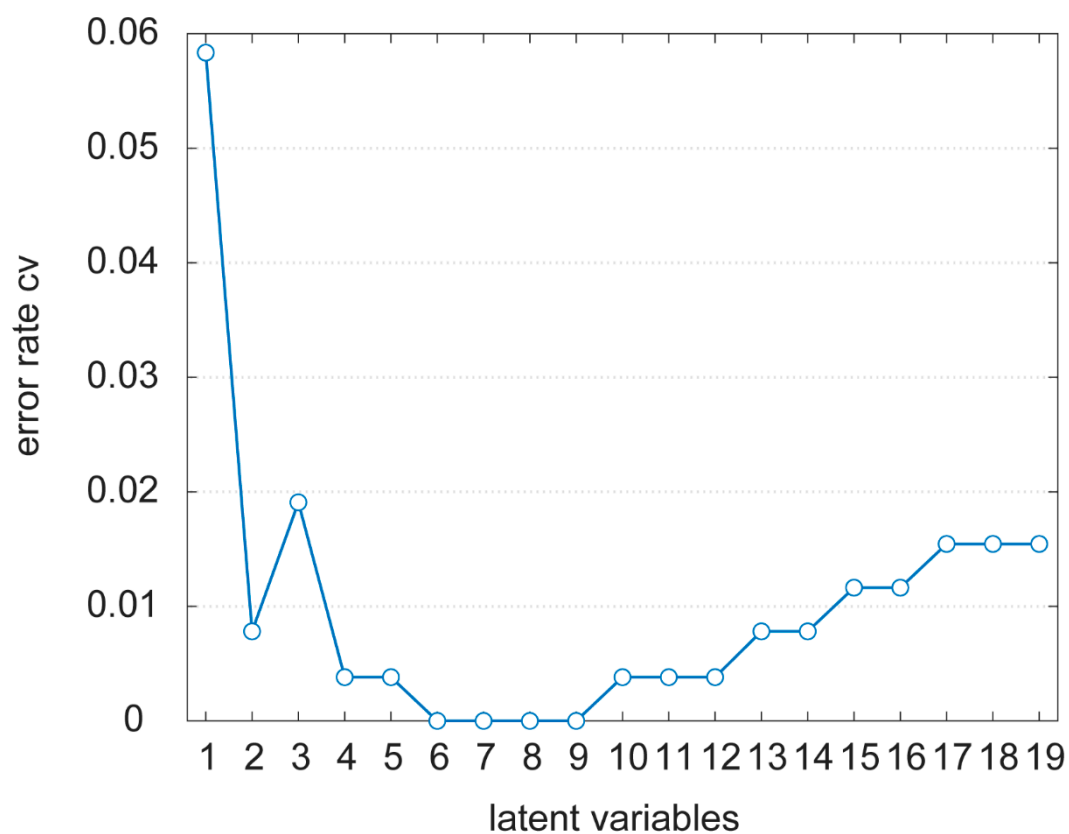

**Figure S2.** Error rate as a function of latent variables calculated in the PLS-DA model for HDPE and LDPE classification. 6 LVs is the optimal number.

**Table S1.** Confusion matrices obtained from PLS-DA model, both in fitting and in cross-validation (based on venetian blinds with 10 groups) restricted to PE class.

| Experimental Class | Calculated Class |      |              |
|--------------------|------------------|------|--------------|
|                    | HDPE             | LDPE | Not Assigned |
| Fitting            | -                | -    | -            |
| HDPE               | 125              | 0    | 0            |
| LDPE               | 0                | 131  | 0            |
| Cross-Validation   | -                | -    | -            |
| HDPE               | 125              | 0    | 0            |
| LDPE               | 0                | 131  | 0            |
